# Supplementary material
Source: PubMed Central journal article supplement (PMC8255273)
Supplement: NIHMS1687441-supplement-Supplementary_Material.pdf [file NIHMS1687441-supplement-Supplementary_Material.pdf]

**Supplemental material S1.** Data analysis report.

The full data analysis report including the used R script and functions is available from: <https://sri-human-sleep.github.io/CST-performance/FC3performance-dataAnalysisReport.html>

**Supplemental material S2.** Group-level absolute error matrix in the sample of healthy sleepers and adolescents with insomnia symptoms.

|         |                   | Fitbit Charge 3™ |         |        |       |         |
|---------|-------------------|------------------|---------|--------|-------|---------|
|         |                   | Wake             | “light” | “deep” | REM   | PSG tot |
| Wake    | Healthy sleepers  | 1,481            | 678     | 39     | 229   | 2,427   |
|         | Insomnia symptoms | 858              | 141     | 2      | 64    | 1,065   |
| “light” | Healthy sleepers  | 930              | 9,508   | 857    | 877   | 12,172  |
|         | Insomnia symptoms | 437              | 3,941   | 441    | 706   | 5,525   |
| “deep”  | Healthy sleepers  | 91               | 2,047   | 2,959  | 14    | 5,111   |
|         | Insomnia symptoms | 51               | 973     | 1,422  | 40    | 2,486   |
| REM     | Healthy sleepers  | 137              | 829     | 44     | 3,316 | 4,326   |
|         | Insomnia symptoms | 109              | 576     | 8      | 1,531 | 2,224   |
| FC3 tot | Healthy sleepers  | 2,639            | 13,062  | 3,899  | 4,436 | 24,036  |
|         | Insomnia symptoms | 1,455            | 5,631   | 1,873  | 2,341 | 11,300  |

“light”, PSG-based N1 + N2; “deep”, PSG-based N3; **REM**, Rapid-Eye-Movement sleep; **PSG**, polysomnography; **FC3**, Fitbit Charge 3™.

**Supplemental material S3.** Model comparison and estimated parameters for the factors potentially affecting absolute discrepancies between Fitbit Charge 3™ and polysomnography (PSG), and epoch-by-epoch agreement in the sample of healthy. Statistics are reported with and without (as in S1) considering PSG measures as an additional predictor accounting for the size of measurement.

| N obs.                              | Predictor               | Without considering PSG measures |                |                   |         |         | Considering also PSG measures |                |                   |         |         |
|-------------------------------------|-------------------------|----------------------------------|----------------|-------------------|---------|---------|-------------------------------|----------------|-------------------|---------|---------|
|                                     |                         | AICw                             | R <sup>2</sup> | Coeff. (St. Err.) | t value | p value | AICw                          | R <sup>2</sup> | Coeff. (St. Err.) | t value | p value |
| Absolute discrepancies<br>TST (min) | Intercept               |                                  | .000           | -7.20 (12.70)     | -.57    | .576    |                               | .000           | -7.20 (12.70)     | -.57    | .576    |
|                                     | <b>PSG TST</b>          |                                  |                |                   |         |         | <b>.49</b>                    | <b>.073</b>    |                   |         |         |
|                                     | Sex                     | .28                              | .004           |                   |         |         | .28                           | .004           |                   |         |         |
|                                     | 25 Age                  | .29                              | .008           |                   |         |         | .29                           | .008           |                   |         |         |
|                                     | Body mass index         | .67                              | .126           | 1.01 (.56)        | 1.82    | .080    | .67                           | .126           | 1.01 (.56)        | 1.82    | .080    |
|                                     | Firmware version        | .09                              | .135           |                   |         |         | .09                           | .135           |                   |         |         |
|                                     | Time of data collection | .29                              | .127           |                   |         |         | .29                           | .127           |                   |         |         |
| Absolute discrepancies<br>SE (%)    | Intercept               |                                  | .000           | 3.52 (.47)        | 7.49    | <.001   |                               | .000           | 3.52 (.47)        | 7.49    | <.001   |
|                                     | <b>PSG SE</b>           |                                  |                |                   |         |         | <b>.40</b>                    | <b>.045</b>    |                   |         |         |
|                                     | Sex                     | .32                              | .018           |                   |         |         | .32                           | .018           |                   |         |         |
|                                     | 25 Age                  | .33                              | .021           |                   |         |         | .33                           | .021           |                   |         |         |
|                                     | Body mass index         | .48                              | .072           |                   |         |         | .48                           | .072           |                   |         |         |
|                                     | Firmware version        | .15                              | .020           |                   |         |         | .15                           | .020           |                   |         |         |
|                                     | Time of data collection | .27                              | <.001          |                   |         |         | .27                           | <.001          |                   |         |         |

Continue below

| N obs.                                            | Predictor                   | Without considering PSG measures |                |                   |         |         | Considering also PSG measures |                |                   |              |                 |
|---------------------------------------------------|-----------------------------|----------------------------------|----------------|-------------------|---------|---------|-------------------------------|----------------|-------------------|--------------|-----------------|
|                                                   |                             | AICw                             | R <sup>2</sup> | Coeff. (St. Err.) | t value | p value | AICw                          | R <sup>2</sup> | Coeff. (St. Err.) | t value      | p value         |
| Absolute discrepancies SOL (min)                  | Intercept                   |                                  | .000           | 4.41 (.59)        | 7.48    | <.001   |                               | .000           | 4.41 (.59)        | 7.48         | <.001           |
|                                                   | <b>PSG SOL</b>              |                                  |                |                   |         |         | .27                           | .002           |                   |              |                 |
|                                                   | Sex                         | .41                              | .046           |                   |         |         | .41                           | .046           |                   |              |                 |
|                                                   | Age                         | .43                              | .051           |                   |         |         | .43                           | .051           |                   |              |                 |
|                                                   | Body mass index             | .28                              | .005           |                   |         |         | .28                           | .005           |                   |              |                 |
|                                                   | Firmware version            | .40                              | .112           |                   |         |         | .40                           | .112           |                   |              |                 |
|                                                   | Time of data collection     | .31                              | .015           |                   |         |         | .31                           | .015           |                   |              |                 |
| Absolute discrepancies WASO (min)                 | Intercept                   |                                  | .000           | -13.61 (13.29)    | -1.03   | .314    |                               | .000           | -13.61 (13.29)    | -1.03        | .314            |
|                                                   | <b>PSG WASO</b>             |                                  |                |                   |         |         | <b>.33</b>                    | <b>.024</b>    |                   |              |                 |
|                                                   | Sex                         | .32                              | .019           |                   |         |         | .32                           | .019           |                   |              |                 |
|                                                   | Age                         | .27                              | .001           |                   |         |         | .27                           | .001           |                   |              |                 |
|                                                   | Body mass index             | .76                              | .159           | 1.21 (.58)        | 2.087   | .048    | .76                           | .159           | 1.21 (.58)        | 2.087        | .048            |
|                                                   | Firmware version            | .15                              | .023           |                   |         |         | .15                           | .023           |                   |              |                 |
|                                                   | Time of data collection     | .27                              | .001           |                   |         |         | .27                           | .001           |                   |              |                 |
| Absolute discrepancies Light sleep duration (min) | Intercept                   |                                  | .000           | 36.56 (5.33)      | 6.86    | <.001   |                               | .000           | 80.98 (27.93)     | 2.90         | .01             |
|                                                   | <b>PSG "light" duration</b> |                                  |                |                   |         |         | <b>.58</b>                    | <b>.095</b>    | <b>-.20 (.12)</b> | <b>-1.62</b> | <b>.12</b>      |
|                                                   | Sex                         | .42                              | .048           |                   |         |         | .42                           | .172           |                   |              |                 |
|                                                   | Age                         | .38                              | .036           |                   |         |         | .26                           | .128           |                   |              |                 |
|                                                   | Body mass index             | .27                              | .002           |                   |         |         | .20                           | .095           |                   |              |                 |
|                                                   | Firmware version            | .38                              | .105           |                   |         |         | .20                           | .129           |                   |              |                 |
|                                                   | Time of data collection     | .49                              | .068           |                   |         |         | .22                           | .113           |                   |              |                 |
| Absolute discrepancies Deep sleep duration (min)  | Intercept                   |                                  | .000           | 27.18 (4.74)      | 5.73    | <.001   |                               | .000           | -32.67 (15.49)    | -2.19        | .04             |
|                                                   | <b>PSG "deep" duration</b>  |                                  |                |                   |         |         | <b>.99</b>                    | <b>.388</b>    | <b>.63 (.16)</b>  | <b>3.89</b>  | <b>&lt;.001</b> |
|                                                   | Sex                         | .28                              | .005           |                   |         |         | .27                           | .388           |                   |              |                 |
|                                                   | Age                         | .28                              | .005           |                   |         |         | .03                           | .390           |                   |              |                 |
|                                                   | Body mass index             | .39                              | .041           |                   |         |         | .30                           | .395           |                   |              |                 |
|                                                   | Firmware version            | .12                              | .004           |                   |         |         | .13                           | .394           |                   |              |                 |
|                                                   | Time of data collection     | .27                              | <.001          |                   |         |         | .27                           | .388           |                   |              |                 |
| Absolute discrepancies REM sleep duration (min)   | Intercept                   |                                  | .000           | 18.11 (2.17)      | .64     | .530    |                               | .000           | 4.72 (7.35)       | .64          | .53             |
|                                                   | <b>PSG REM duration</b>     |                                  |                |                   |         |         | <b>.69</b>                    | <b>.126</b>    | <b>.17 (.09)</b>  | <b>1.90</b>  | <b>.07</b>      |
|                                                   | Sex                         | .28                              | .002           |                   |         |         | .22                           | .133           |                   |              |                 |
|                                                   | Age                         | .29                              | .006           |                   |         |         | .26                           | .147           |                   |              |                 |
|                                                   | Body mass index             | .32                              | .017           |                   |         |         | .23                           | .134           |                   |              |                 |
|                                                   | Firmware version            | .14                              | .015           |                   |         |         | .13                           | .153           |                   |              |                 |
|                                                   | Time of data collection     | .29                              | .006           |                   |         |         | .23                           | .135           |                   |              |                 |
| N obs.                                            | Predictor                   | AICw                             | R <sup>2</sup> | Coeff. (St. Err.) | z value | p value | AICw                          | R <sup>2</sup> | Coeff. (St. Err.) | z value      | p value         |
| Epoch-by-epoch agreement (logit)                  | Intercept                   |                                  | .000           | .96 (.07)         | 12.77   |         |                               | .000           | .96 (.07)         | 12.77        |                 |
|                                                   | PSG TST                     |                                  |                |                   |         |         | .44                           | .003           |                   |              |                 |
|                                                   | Sex                         | .39                              | .002           |                   |         |         | .39                           | .002           |                   |              |                 |
|                                                   | Age                         | .27                              | <.001          |                   |         |         | .27                           | <.001          |                   |              |                 |
|                                                   | Body mass index             | .33                              | .001           |                   |         |         | .33                           | .001           |                   |              |                 |
|                                                   | Firmware version            | .48                              | .006           |                   |         |         | .48                           | .006           |                   |              |                 |
|                                                   | Time of data collection     | .40                              | .002           |                   |         |         | .40                           | .002           |                   |              |                 |
|                                                   | Mean FC3 HR                 | .40                              | .002           |                   |         |         | .40                           | .002           |                   |              |                 |

**Aw**, Aikake weight resulting from the comparison of each model with the null model (with intercept only), and with any model showing higher Aw than the null; **Coeff.**, unstandardized coefficient estimated by the selected model (only predictors included in the selected model are showed).

**Supplemental material S4.** Number of epochs and magnitude (absolute percentage) of heart rate acceleration/deceleration detected by the Fitbit Charge 3™ in response to polysomnographic epoch-by-epoch (EBE) transitions by EBE transition agreement and the type of transition in the sample of healthy sleepers.

| PSG EBE transition | Total<br>N | FC3 accurately detected<br>PSG EBE transitions |                               | FC3 inaccurately detected<br>EBE PSG transitions |                               |
|--------------------|------------|------------------------------------------------|-------------------------------|--------------------------------------------------|-------------------------------|
|                    |            | N                                              | Abs. % HR change<br>Mean (SD) | N                                                | Abs. % HR change<br>Mean (SD) |
| wake ↔ wake        | 1,756      | 967 (55.07%)                                   | 7.24 (3.60)                   | 789 (44.93%)                                     | 8.67 (5.35)                   |
| light ↔ light      | 11,250     | 8,763 (77.89%)                                 | 2.46 (.35)                    | 2,487 (22.11%)                                   | 3.75 (1.06)                   |
| deep ↔ deep        | 4,798      | 2,837 (59.13%)                                 | 1.30 (.30)                    | 1,961 (40.87%)                                   | 2.08 (1.33)                   |
| REM ↔ REM          | 4,088      | 3,104 (75.93%)                                 | 3.78 (1.06)                   | 984 (24.07%)                                     | 3.17 (1.01)                   |
| wake → light       | 556        | 147 (26.44%)                                   | 11.42 (5.41)                  | 409 (73.56%)                                     | 9.34 (4.03)                   |
| wake ← light       | 428        | 127 (29.67%)                                   | 8.04 (4.02)                   | 301 (70.33%)                                     | 7.21 (4.45)                   |
| light → deep       | 264        | 2 (.76%)                                       | 1.41 (.82)                    | 262 (99.24%)                                     | 2.25 (1.01)                   |
| light ← deep       | 186        | 0 (0%)                                         |                               | 186 (100%)                                       | 3.99 (2.64)                   |
| light → REM        | 147        | 7 (4.76%)                                      | 2.57 (1.81)                   | 140 (95.24%)                                     | 5.03 (2.32)                   |
| light ← REM        | 1,756      | 967 (2.15%)                                    | 7.24 (3.60)                   | 789 (97.85%)                                     | 8.67 (5.35)                   |
| wake ← deep        | 91         | 21 (23.08%)                                    | 4.73 (5.04)                   | 70 (76.92%)                                      | 9.09 (12.12)                  |
| wake ← REM         | 106        | 24 (22.64%)                                    | 6.75 (3.59)                   | 82 (77.36%)                                      | 9.36 (11.51)                  |
| wake → REM         | 49         | 7 (14.29%)                                     | 7.90 (8.58)                   | 42 (85.71%)                                      | 9.77 (7.36)                   |
| wake → deep        | 16         | 0 (0%)                                         |                               | 16 (100%)                                        | 10.46 (7.60)                  |
| deep → REM         | 4          | 0 (0%)                                         |                               | 4 (100%)                                         | 2.44 (1.30)                   |
| N                  | 23,832     | 16,008 (67.17%)                                |                               | 7,824 (32.83%)                                   |                               |

PSG, polysomnography; EBE, epoch-by-epoch; FC3, Fitbit Charge 3™, HR, Heart Rate; REM, Rapid-Eye-Movement; N, number of PSG sleep stage transitions.
